# Supplementary material
Source: Springer Nature journal article supplement (https://www.springermedizin.de/resource/supplementary/12889_2013_6124_MOESM2_ESM.pdf/9494478)

### Trigger factors

#### *Individual factors*

- Self competence\*
- Satisfaction with academic performance

#### *Family factors*

- Family interactions\*
- Parental support\*

#### *Peer factors*

- Number of good friends in class\*
- Perceived popularity in class

### Background factors

- Sex
- Residential area
- Perceived family income

### Perceived severity of stressors (in grade 7)

- Academic performance
- Talent and skills
- Advancing to high school
- Getting along with friends
- Getting along with teachers
- Getting along with parents
- Family economic status
- Body shape
- Romantic relationships

### Suicidal ideation

- Onset of suicidal ideation in grade 7

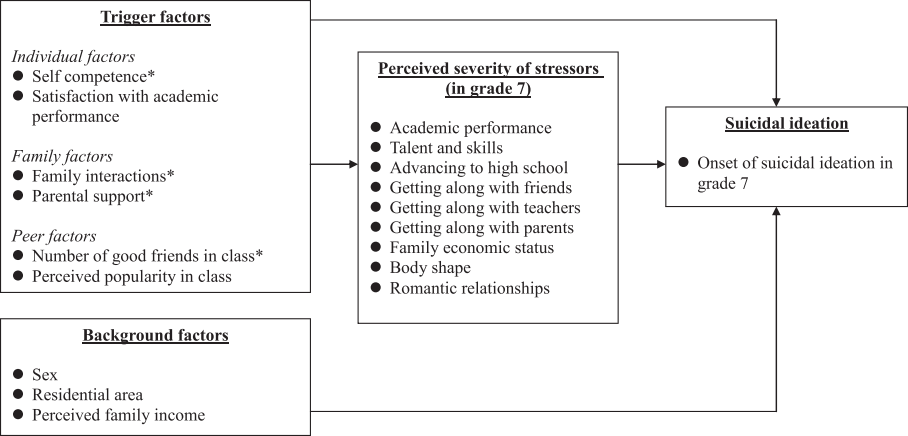

Supplement: MOESM2 [file 9494478]
